# Supplementary material for: Comprehensive study of SNAREs involved in the post-Golgi transport in Drosophila photoreceptors
Source: PubMed Central journal article supplement (PMC11666571; doi:10.3389/fcell.2024.1442192), 2024-12-10
Supplement: Presentation1.pdf [file Presentation1.pdf]

## ***Supplementary Material***

### **Supplemental Material and Methods.**

#### **Construction of plasmids**

##### **pU62-wsh1**

pU62-wsh1 is a plasmid carrying a cassette that works as a "dominant white-eye" marker in *Drosophila*, consist of *Drosophila* U6-2 promoter and shRNA against white gene. This vector was constructed based on a vector, pAc-sgRNA-Cas9 (Bassett et al., 2014) by inserting a synthetic shRNA unit against white gene, HMS00017, predesigned in TRiP RNAi & CRISPR fly project (Zirin et al., 2020). Four oligonucleotides TTC-wsh1-F1, wsh1-R1p, wsh1-F2p and wsh1-Ap-GTT were ligated into pAc-sgRNA-Cas9 digested with BbsI, to obtain pU62-wsh1.

##### **pBIDwsh-UASC**

pBIDwsh-UASC is a phi31 transgenic vector based on pBID-UASC (Wang et al., 2012) but carrying "dominant white-eye" marker instead of miniature-white "red-eye" marker. From pU62-wsh1, U6-wshRNA cassette was amplified with primers Nh-U62 and gCas9puro-F, then digested with NheI and ApaI, and then cloned between NheI and ApaI sites of pBID-UASC to obtain pBID-wsh-UASC.

##### **pBIDwsh-Act5C-coinFLP-Gal4**

pBIDwsh-Act5C-coinFLP-Gal4 is a phi31 transgenic vector carrying "dominant white-eye" marker and coinFLP-Gal4 cassette under control of Act5C promoter. From original coinFLP vector, pAct5C-FRT-stop-FRT3-FRT-FRT3-Gal4 attB (Bosch et al., 2015), the DNA fragment including Act5C promoter and FRT-stop-FRT3-FRT-FRT3-Gal4 cassette was amplified with primers Sbf-BID-Act5C-F and Gal4-BID-Xh-R. Using Gibson assembly, the fragment was cloned between SbfI and BglII sites of pBIDwsh-UASC, replacing UASC promoter and multiple cloning sites, to obtain pBIDwsh-Act5C-coinFLP-Gal4.

##### **5x longGMR promoter**

The longGMR promoter (Wernet et al., 2003) consists of five copies of enhancer sequence in the upstream of Rh1 promoter and a basal promoter core of hsp70. Since the detail of the construct was not described, the region containing longGMR promoter was amplified using PCR with primers wdelR\_Nhe and Gal4DBD-R2 from a transgenic fly caring P{longGMR-Gal4} (Bloomington *Drosophila* Stock Center #8605). The sequence of the entire longGMR promoter is available in Dryad.

##### **pP-longGMR, pBID-longGMR and pBIDwsh-longGMR**

The fragment containing longGMR promoter was digested with SphI and EcoRI and then ligated between SphI and EcoRI sites of pPdM-UAST (Yamashita et al., 2022), pBID-UASC, and pBIDwsh-UASC, to obtain pP-longGMR, pBID-longGMR, and pBIDwsh-longGMR, respectively.

##### **pP-3xlongGMR, pBID-3xlongGMR and pBIDwsh-3xlongGMR**

DNA fragments with various number of LGMR repeats were amplified from pP-longGMR, with primers Sph-longGMR and UAST-R4. The fragments were digested with SphI and EcoRI, then separated by size in agarose gel electrophoresis, and then ligated into pPdM-UAST, pBID-UASC, and pBIDwsh-UASC, to obtain pP-3xlongGMR, pBID-3xlongGMR, and pBIDwsh-3xlongGMR, respectively.

### **pP-longGMR-coinFLP-Gal4 and pBIDwsh-longGMR-coinFLP-Gal4**

From pBIDwsh-Act5C-coinFLP-Gal4, DNA fragments including FRT-stop-FRT3-FRT-FRT3-Gal4 cassette were excised with BamHI and KpnI, and then ligated between BglII and KpnI sites in pP-longGMR, pP-3xlongGMR and pBIDwsh-longGMR to obtain pP-LongGMR-coinFLP-Gal4, pP-3xlongGMR-coinFLP-Gal4 and pBIDwsh-longGMR-coinFLP-Gal4.

### **pX-HFCas9**

A mammalian CRISPR-Cas9 KO vector, pX-HFCas9, coding HiFiCas9<sup>R691A</sup> (Vakulskas et al., 2018) was constructed based on pSpCas9 (BB)-2A-Puro PX459 V2.0 (Ran et al., 2013), by introducing R691A mutation in the Cas9 gene using Gibson assembly with primers HF-Cas9-F and HF-Cas9-R.

### **CoinFLP-longGMR-FLAG::Cas9-H2B::2xNG and CoinFLP-Act5C-FLAG::Cas9-H2B::GFP**

DNA fragments including HFCas9-T2A was amplified from pX-HF-Cas9 with Bg-Coin-Cas9 and ddT2A-R. DNA fragments including H2B-GFP was amplified from pcDNA3.1 miniSOG2 T2A H2B-EGFP (Makhijani et al., 2017) with ddT2A-F2 and H2B-EGFP-BID-K. Using Gibson assembly, fragments HFCas9-T2A and H2B-2xmNeonGreen were cloned between BglII and KpnI sites of pBIDwsh-Act5C -coin-Gal4 and pP-3xlongGMR-coinFLP-Gal4 to obtain pBIDwsh-Act5C-coinFLP-HFCas9-H2B-GFP and pP-3xlongGMR-coinFLP-HFCas9-H2B-2xNG.

### **pCFD4w-Syx6**

A phi31 vector pCFD4w was constructed by replacing promoter-gRNA scaffold of pCFD5w, a phi31 vector with white<sup>+</sup> marker (gift from Michael Boutros, Addgene plasmid #112645), by those of pCFD4. DNA fragments including dU6:2-BbsI-gRNA scaffold were amplified with primers Sgf-U61F and dU6-wsh-fix and digested with EcoRI and NheI, then inserted between EcoRI and XbaI sites of pCFD5w. To construct pCFD4w-Syx6, oligonucleotides Syx6-gRNA3f and Syx6-gRNA3r were annealed and ligated with BbsI digested pCFD4w.

### **UAS-Myc::Ykt6, UAS-HA::Snap24 and UAS-HA::Snap25**

From third instar larvae cDNA, DNA fragment encoding Ykt6 were amplified using primers Xh-dYkt6 and dYkt6-MluI, then digested with XhoI and MluI, and then ligated between XhoI and MluI sites in pMT-HA-NBgA-m, to generate pMT-HA-Ykt6. The fragment containing Ykt6 was excised with XhoI and XbaI and then inserted into pPdM-UAST-m2NBgAm to generate pUAST-myc-Ykt6. DNA fragment encoding Snap24 and Snap25 were amplified using primers Xh-Snap24, Snap24-Ap, Xh-Snap25 and Snap25-Ap, digested with XhoI and ApaI, and cloned into pMT-HA-NBgA-m to obtain pMT-HA-Snap24 and pMT-HA-Snap25. HA-Snap24 and HA-Snap25 fragments were excised with KpnI and MluI, and then inserted into pPdM-UAST-m2NBgAm to generate pUAST-HA-Snap24 and pUAST-HA-Snap25.

## Supplemental references.

**Bassett, A. R., Tibbit, C., Ponting, C. P. and Liu, J. L.** (2014). Mutagenesis and homologous recombination in *Drosophila* cell lines using CRISPR/Cas9. *Biol Open* **3** (1), 42-9.

**Bosch, J. A., Tran, N. H. and Hariharan, I. K.** (2015). CoinFLP: a system for efficient mosaic screening and for visualizing clonal boundaries in *Drosophila*. *Development* **142** (3), 597-606.

**Makhijani, K., To, T. L., Ruiz-González, R., Lafaye, C., Royant, A. and Shu, X.** (2017). Precision Optogenetic Tool for Selective Single- and Multiple-Cell Ablation in a Live Animal Model System. *Cell Chem Biol* **24** (1), 110-119.

**Ran, F. A., Hsu, P. D., Wright, J., Agarwala, V., Scott, D. A. and Zhang, F.** (2013). Genome engineering using the CRISPR-Cas9 system. *Nat Protoc* **8**, 2281-2308.

**Vakulskas, C. A., Dever, D. P., Rettig, G. R., Turk, R., Jacobi, A. M., Collingwood, M. A., Bode, N. M., McNeill, M. S., Yan, S., Camarena, J. et al.** (2018). A high-fidelity Cas9 mutant delivered as a ribonucleoprotein complex enables efficient gene editing in human hematopoietic stem and progenitor cells. *Nat Med* **24** (8), 1216-1224.

**Wang, J. W., Beck, E. S. and McCabe, B. D.** (2012). A modular toolset for recombination transgenesis and neurogenetic analysis of *Drosophila*. *PLoS One* **7** (7), e42102.

**Wernet, M. F., Labhart, T., Baumann, F., Mazzoni, E. O., Pichaud, F. and Desplan, C.** (2003). Homothorax switches function of *Drosophila* photoreceptors from color to polarized light sensors. *Cell* **115** (3), 267-79.

**Yamashita, H., Ochi, Y., Yamada, Y., Sasaki, S., Tago, T., Satoh, T. and Satoh, A. K.** (2022). Functions of neuronal Synaptobrevin in the post-Golgi transport of Rhodopsin in *Drosophila* photoreceptors. *J Cell Sci* **135** (24), jcs260196.

**Zirin, J., Hu, Y., Liu, L., Yang-Zhou, D., Colbeth, R., Yan, D., Ewen-Campen, B., Tao, R., Vogt, E., VanNest, S. et al.** (2020). Large-Scale Transgenic. *Genetics* **214** (4), 755-767.

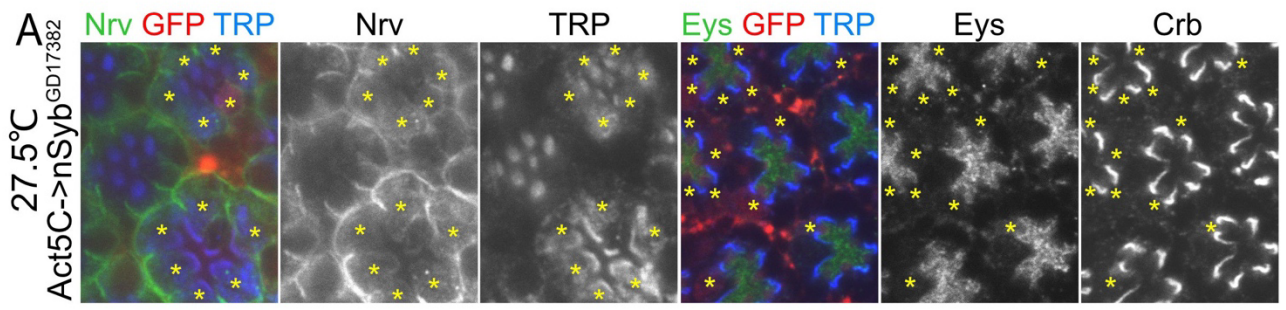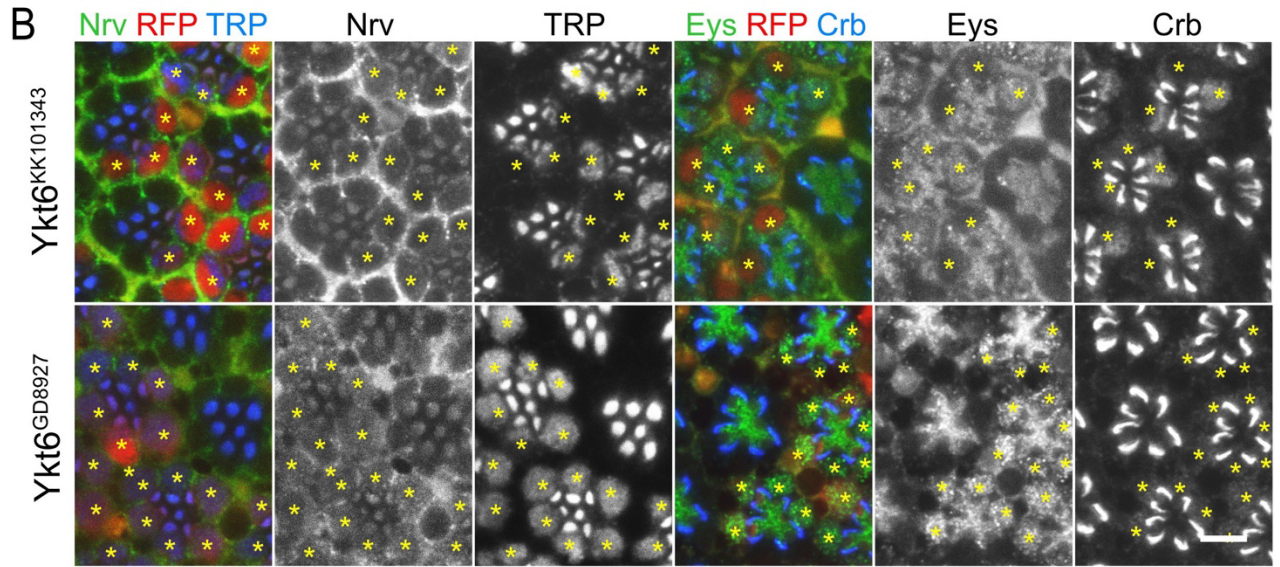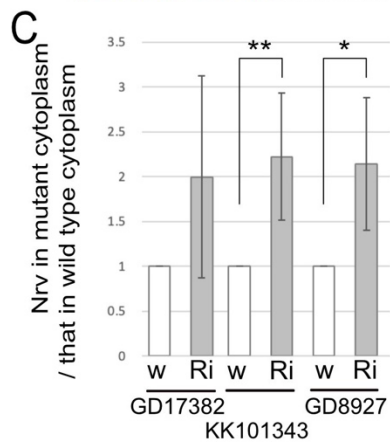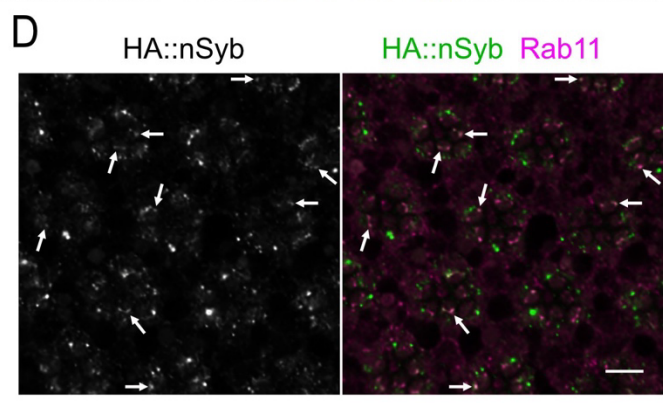

### Supplemental Figure 1. nSyb and Ykt6 are required for the post-Golgi transport.

(A) Immunostaining of nSybRNAi<sup>GD17382</sup>-expressing retinas by eyeless-CoinFLP-Act5C-Gal4 using anti-Nrv (green) and anti-TRP (blue) antibodies in left, and anti-Eys (green) and anti-Crb (blue) antibodies in right. GFP (red) and asterisks represent the cells

(B) Immunostaining of Ykt6RNAi<sup>KK101343</sup> or Ykt6RNAi<sup>GD8927</sup>-expressing retinas by eyeless-CoinFLP-longGMR-Gal4 using anti-Nrv (green) and anti-TRP (blue) antibodies in left, and anti-Eys (green) and anti-Crb (blue) antibodies in right. RFP (red) and asterisks represent the cells expressing RNAi constructs.

(C) The ratio of integrated fluorescence density for Nrv staining of the cytoplasm in the cells expressing RNAi constructs compared with that in wild-type cells was plotted. White bars indicate wild-type cells (w) and gray bars indicate the cells expressing RNAi constructs (Ri). Error bars indicate the SD with four retinas. Significance according to two-tailed unpaired Student's *t*-test: \* $p < 0.05$ , \*\* $p < 0.01$ .

(D) Immunostaining of HA::nSyb-expressing retina using anti-HA (green) and anti-Rab11 (magenta) antibodies. Arrows show colocalization of HA::nSyb and Rab11 at the base of the rhabdomeres.

Scale bar: 5  $\mu$ m (A, B and D).

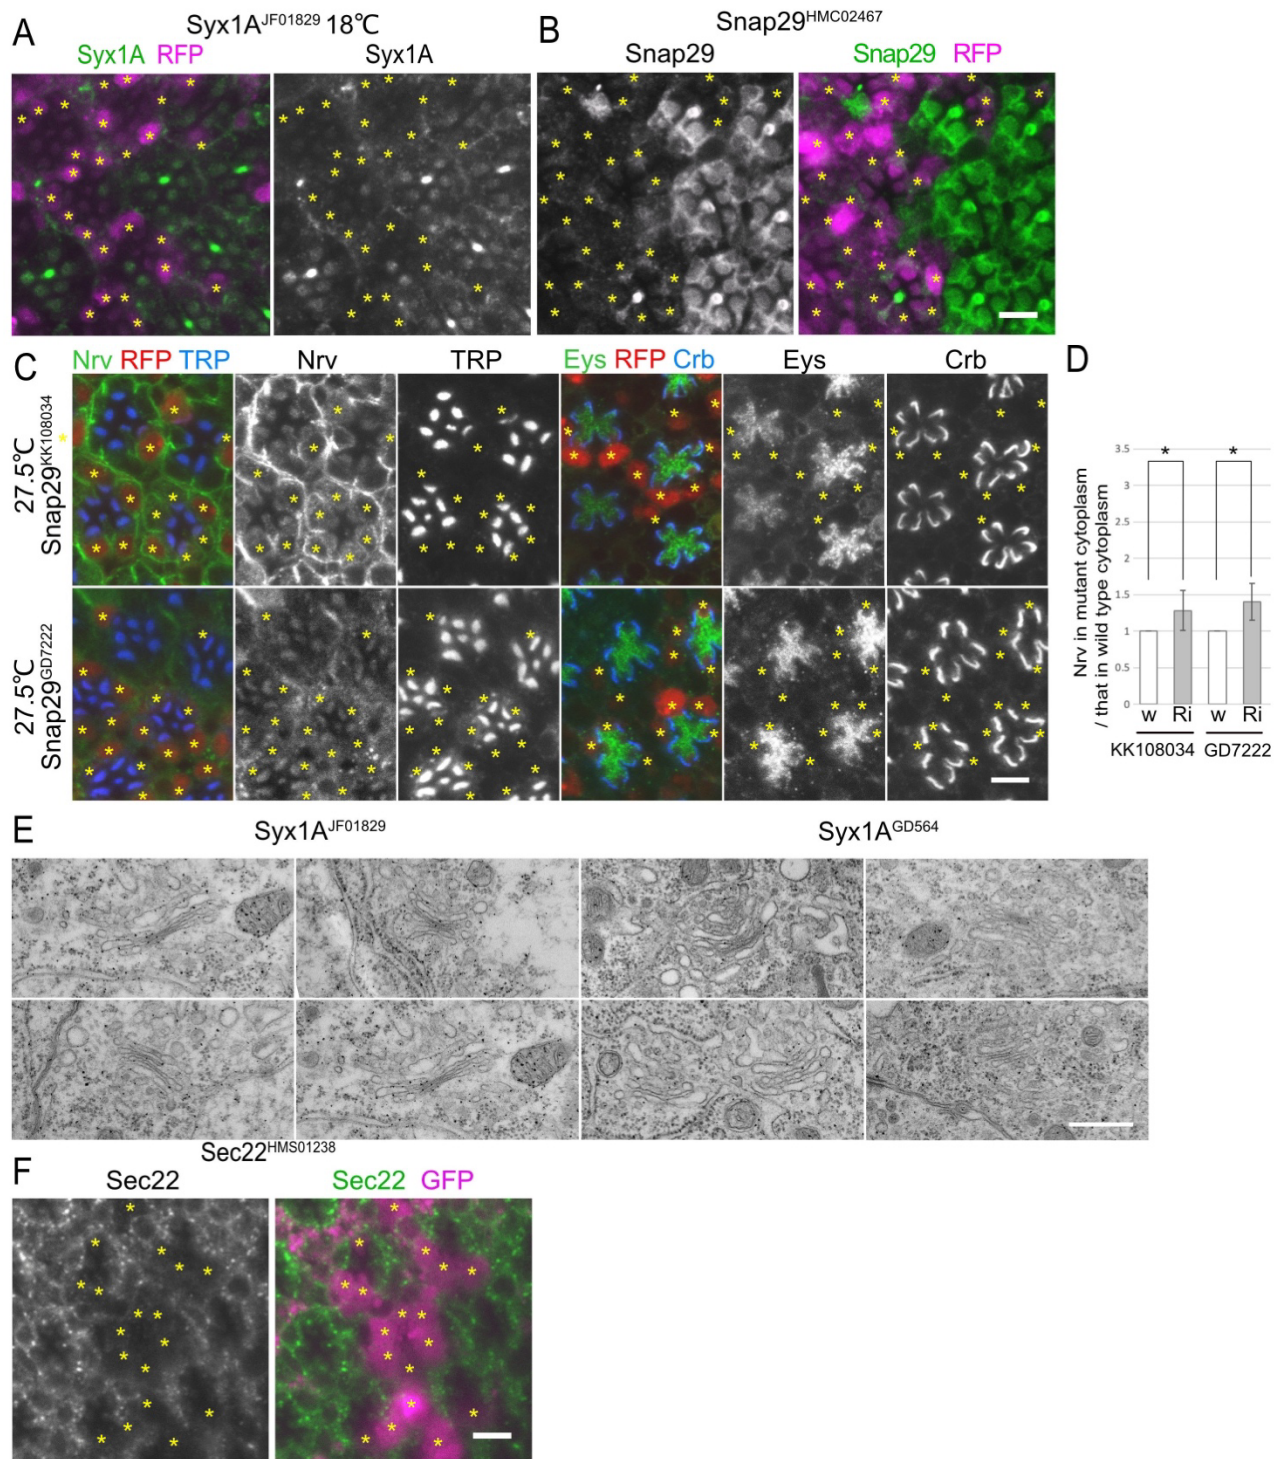

**Supplemental Figure 2. Snap29 is required for the post-Golgi transport.**

(A) Immunostaining of Syx1ARNai<sup>JF01829</sup>-expressing retina by eyeless-CoinFLP-longGMR-Gal4 using anti-Syx1A (green) antibody. RFP (magenta) and asterisks represents the cells expressing RNAi constructs.

(B) Immunostaining of Snap29RNAi<sup>HMC02467</sup>-expressing retina by eyeless-CoinFLP-longGMR-Gal4 using anti-Snap29 (green) antibody. RFP (magenta) represents and asterisks the cells expressing RNAi constructs.

(C) Immunostaining of Snap29RNAi<sup>KK108034</sup> or Snap29RNAi<sup>GD7222</sup>-expressing retinas by eyeless-CoinFLP-longGMR-Gal4 using anti-Nrv (green) and anti-TRP (blue) antibodies in left, and anti-Eys (green) and anti-Crb (blue) antibodies in right. RFP (red) and asterisks represent the cells expressing RNAi constructs.

(D) The ratio of integrated fluorescence density for Nrv staining of the cytoplasm in the cells expressing RNAi constructs compared with that in wild-type cells was plotted. White bars indicate wild-type cells (w) and gray bars indicate the cells expressing RNAi constructs (Ri). Error bars indicate the SD with four retinas. Significance according to two-tailed unpaired Student's *t*-test: \**p* < 0.05.

(E) Electron micrographs of Golgi stacks in the photoreceptors expressing Syx1ARNai<sup>JF01829</sup> (left) and Syx1ARNai<sup>GD564</sup> (right).

(F) Immunostaining of Sec22RNAi<sup>HMS01238</sup>-expressing retina by eyeless-CoinFLP-Act5C-Gal4 using anti-Sec22 (green) antibody. GFP (magenta) and asterisks represents the cells expressing RNAi constructs.

Scale bar: 5  $\mu$ m (A–C), 500nm (D) and 5  $\mu$ m (E).

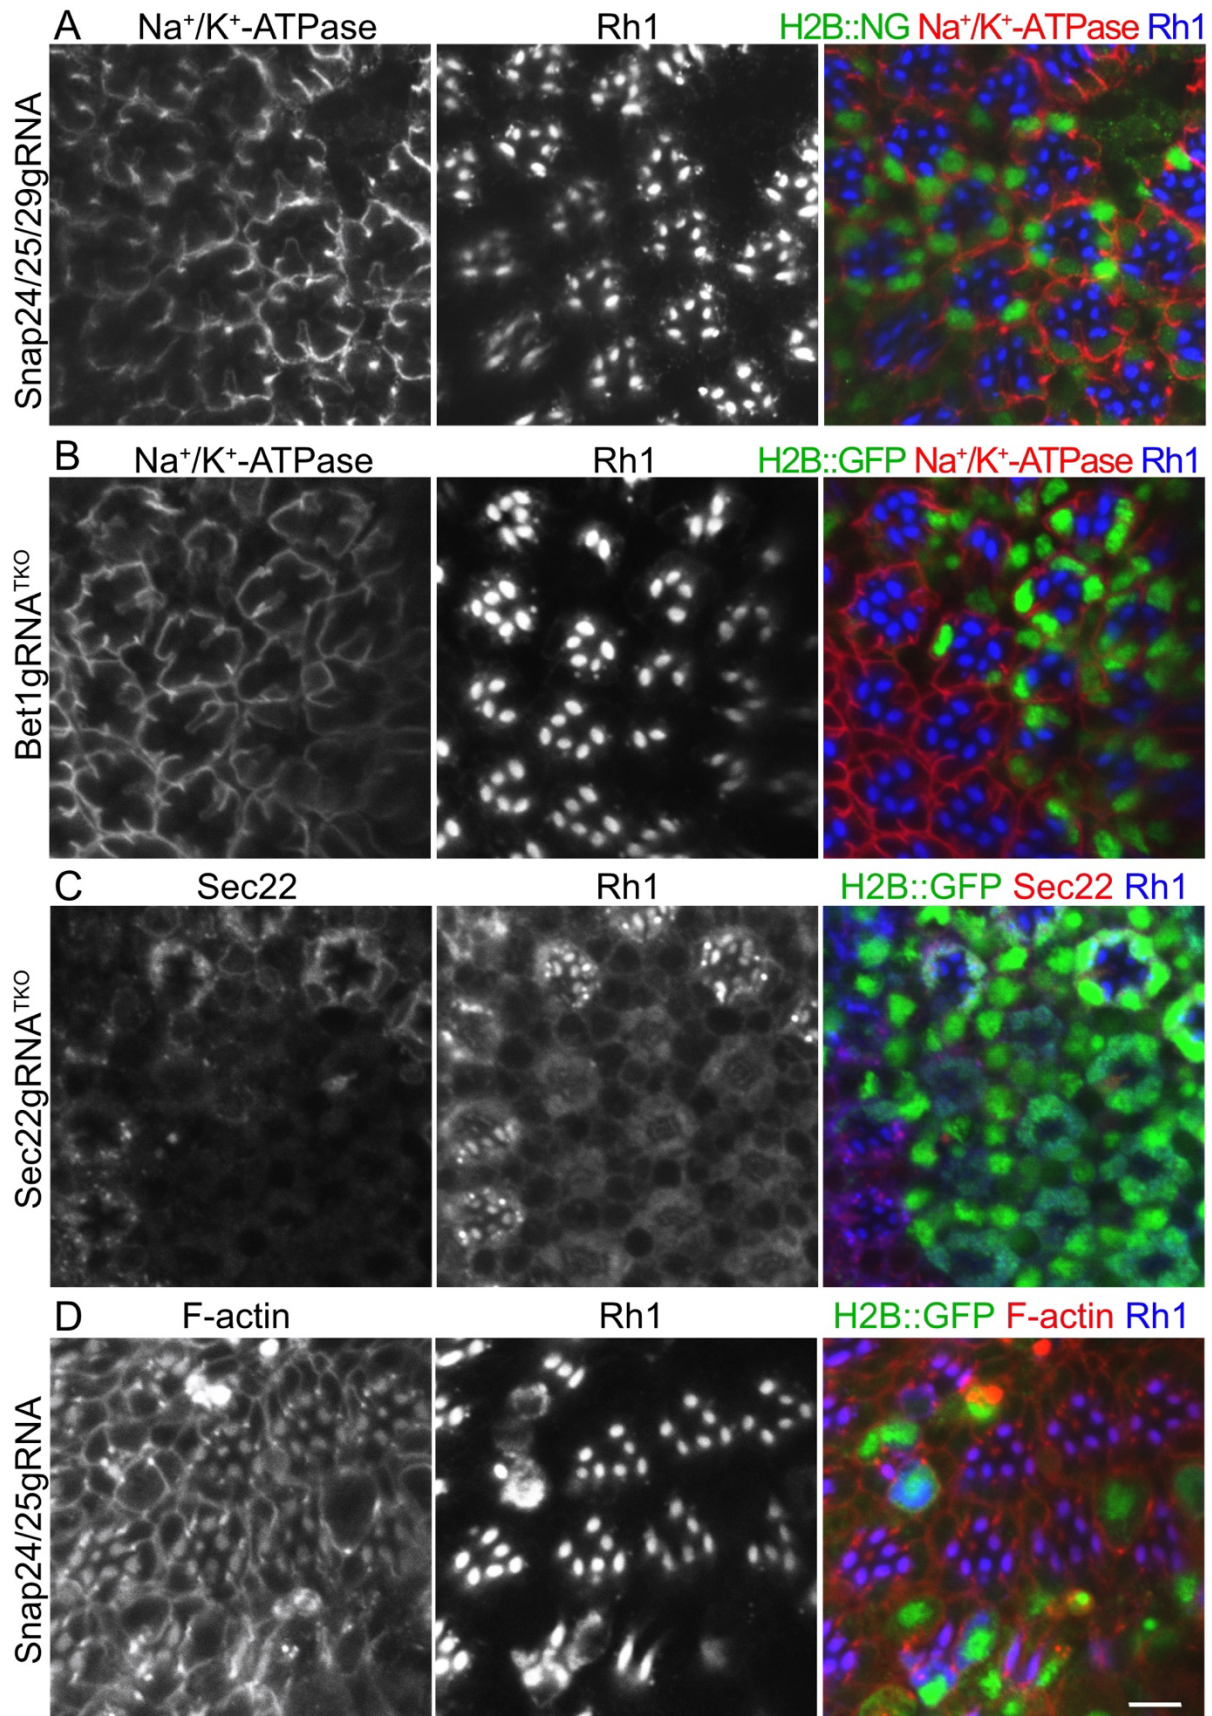



**Supplemental Figure 3.** gRNA lines show some phenotypes with somatic CRISPR/Cas9.

(A) Immunostaining of Snap24, Snap25 and Snap29gRNA-expressing retina combined with eyeless-CoinFLP-longGMR-FLAG::Cas9-H2B::NG using anti-Na<sup>+</sup>/K<sup>+</sup>-ATPase- $\alpha$  (red) and anti-Rh1 (blue) antibodies. H2B::NG (green) represents cells expressing FLAG::Cas9.

(B–D) Immunostaining of Bet1gRNA (B) -, Sec22gRNA (C) -, or Snap24/Snap25gRNA (D) - expressing retina combined with eyeless-CoinFLP-Act5C-FLAG::Cas9-H2B::GFP using anti-Na<sup>+</sup>/K<sup>+</sup>-ATPase- $\alpha$  (red) and anti-Rh1 (blue) antibodies (B), anti-Sec22 (red) and anti-Rh1 (blue) antibodies (C) or phalloidin (red) and anti-Rh1 (blue) antibodies (D). H2B::GFP (green) represents cells expressing FLAG::Cas9.

Scale bar: 5  $\mu$ m (A–D).

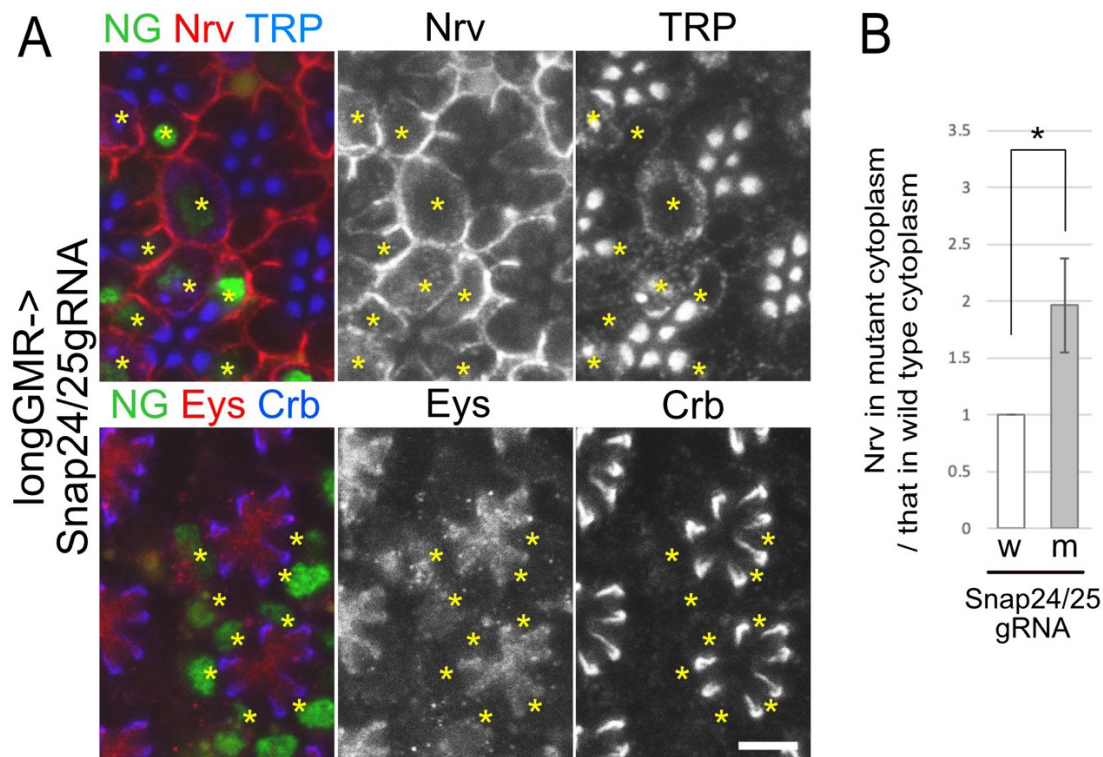

**Supplemental Figure 4. Snap24 and Snap25 are required for the post-Golgi transport.**

(A) Immunostaining of Snap24/Snap25gRNA-expressing retina combined with eyeless-CoinFLP-longGMR-FLAG::Cas9-H2B::NG using anti-Nrv (red) and anti-TRP (blue) antibodies in upper panel, and anti-Eys (red) and anti-Crb (blue) antibodies in lower panel. NG (green) and asterisks represent the cells expressing gRNA constructs.

(B) The ratio of integrated fluorescence density for Nrv staining of the cytoplasm in the cells expressing RNAi constructs compared with that in wild-type cells was plotted. White bars indicate wild-type cells (w) and gray bars indicate the cells expressing gRNA constructs (m). Error bars indicate the SD with four retinas. Significance according to two-tailed unpaired Student's *t*-test:  $*p < 0.05$ .

Scale bar: 5  $\mu$ m (A).

Ochi et al., Table S1

|           | Gene name | CG #     | RNAi line | stock No. | 25°C              | 25°C                | 20°C                |  |
|-----------|-----------|----------|-----------|-----------|-------------------|---------------------|---------------------|--|
|           |           |          |           |           | Act5C-CoinFLPGal4 | longGMR-CoinFLPGal4 | longGMR-CoinFLPGal4 |  |
| SNARE Qa  | Syx1A     | CG31136  | JF01829   | BL25811   | no clone          | unevaluable         | II                  |  |
|           | Syx1A     | CG31136  | GD564     | v33112    | no clone          | unevaluable         | II                  |  |
|           | Syx4      | CG2715   | HMS02771  | BL44054   | no phenotype      |                     |                     |  |
|           | Syx4      | CG2715   | JF01714   | BL31198   | no phenotype      |                     |                     |  |
|           | Syx4      | CG2715   | JF01460   | BL31667   | no phenotype      |                     |                     |  |
|           | Syx4      | CG2715   | GD8646    | v32413    | no phenotype      |                     |                     |  |
|           | Syx7      | CG5081   | KK101990  | v107264   | no clone          | III                 |                     |  |
|           | Syx7      | CG5081   | GD2767    | v5413     | no clone          | III                 |                     |  |
|           | Syx13     | CG11278  | HMS01723  | BL38594   | no phenotype      |                     |                     |  |
|           | Syx13     | CG11278  | JF01920   | BL27984   | no phenotype      |                     |                     |  |
|           | Syx13     | CG11278  | KK111650  | v102432   | III               |                     |                     |  |
|           | Syx13     | CG11278  | GD2449    | v8361     | III               |                     |                     |  |
|           | Syx16     | CG1467   | JF01924   | BL25884   | no phenotype      |                     |                     |  |
|           | Syx16     | CG1467   | HMC03430  | BL51856   | no phenotype      |                     |                     |  |
|           | Syx16     | CG1467   | KK108039  | v109504   | no phenotype      |                     |                     |  |
|           | Syx16     | CG1467   | GD3694    | v8644     | no phenotype      |                     |                     |  |
|           | SNARE Qb  | Syx17    | CG7452    | JF01937   | BL25896           | no phenotype        |                     |  |
|           |           | Syx17    | CG7452    | KK100034  | v108825           | no phenotype        |                     |  |
| Syx17     |           | CG7452   | GD14850   | v36595    | no phenotype      |                     |                     |  |
| Syx18     |           | CG13626  | JF02263   | BL26721   | no phenotype      |                     |                     |  |
| Syx18     |           | CG13626  | KK101345  | v105113   | no clone          | III                 |                     |  |
| Membrin   |           | CG4780   | GLC01633  | BL50515   | no phenotype      |                     |                     |  |
| Gos28     |           | CG7700   | HMS01203  | BL34724   | no phenotype      |                     |                     |  |
| Vti1a     |           | CG3279   | HMS01727  | BL38526   | no phenotype      |                     |                     |  |
| Vti1a     |           | CG3279   | GD2233    | v45725    | no phenotype      |                     |                     |  |
| Vti1b     |           | CG44009  | HMC06083  | BL65221   | no phenotype      |                     |                     |  |
| SNARE Qc  | Sec20     | CG2023   | HMS01172  | BL34693   | no clone          | III                 |                     |  |
|           | Syx6      | CG7736   | JF03125   | BL28505   | no phenotype      |                     |                     |  |
|           | Syx6      | CG7736   | KK109340  | v104795   | no clone          | III                 |                     |  |
|           | Syx6      | CG7736   | GD422     | v1578     | no phenotype      |                     |                     |  |
|           | Syx8      | CG4109   | JF002038  | BL26013   | no phenotype      |                     |                     |  |
|           | Syx8      | CG4109   | KK101612  | v107014   | unevaluable       | III                 |                     |  |
|           | Bet1      | CG14084  | HMS02324  | BL41927   | no phenotype      |                     |                     |  |
|           | Bet1      | CG14084  | HMJ22351  | BL58269   | no clone          | III                 |                     |  |
| SNARE Qbc | Use1      | CG14181  | GLC01442  | BL43253   | III               |                     |                     |  |
|           | Snap24    | CG9474   | JF03146   | BL28719   | no phenotype      |                     |                     |  |
|           | Snap24    | CG9474   | GD4050    | v48033    | no phenotype      |                     |                     |  |
|           | Snap25    | CG40452  | JF02615   | BL27306   | no phenotype      |                     |                     |  |
|           | Snap25    | CG40452  | HMS01367  | BL34377   | no phenotype      |                     |                     |  |
|           | Snap29    | CG11173  | HMC02467  | BL51893   | no clone          | II                  |                     |  |
|           | Snap29    | CG11173  | JF01883   | BL25862   | no clone          | II                  |                     |  |
|           | Snap29    | CG11173  | GD7222    | v18172    | unevaluable       | II                  |                     |  |
|           | Snap29    | CG11173  | KK108034  | v107947   | unevaluable       | II                  |                     |  |
|           | SNARE R   | Syb      | CG12210   | HMS01987  | BL39067           | no phenotype        |                     |  |
| Syb       |           | CG12210  | HMS02728  | BL44014   | no phenotype      |                     |                     |  |
| Syb       |           | CG12210  | HMS01678  | BL38234   | no phenotype      |                     |                     |  |
| Syb       |           | CG12210  | KK113351  | v102922   | no clone          | III                 |                     |  |
| Syb       |           | CG12210  | GD4534    | v30605    | no phenotype      |                     |                     |  |
| nSyb      |           | CG17248  | JF023417  | BL31983   | I                 |                     |                     |  |
| nSyb      |           | CG17248  | KK109893  | v104531   | no phenotype      |                     |                     |  |
| nSyb      |           | CG17248  | GD4553    | v44011    | I                 |                     |                     |  |
| nSyb      |           | CG17248  | GD17382   | v49202    | I                 |                     |                     |  |
| Vamp7     |           | CG1599   | GL01524   | BL43543   | no phenotype      |                     |                     |  |
| Vamp7     |           | CG1599   | HMS01762  | BL38300   | no phenotype      |                     |                     |  |
| Ykt6      |           | CG1515   | HMS01778  | BL38314   | no phenotype      |                     |                     |  |
| Ykt6      |           | CG1515   | HMJ21032  | BL50937   | no clone          | I                   |                     |  |
| Ykt6      |           | CG1515   | GD8927    | v19329    | unevaluable       | I                   |                     |  |
| Ykt6      |           | CG1515   | KK101343  | v105648   | no clone          | I                   |                     |  |
| Sec22     | CG7359    | HMS01238 | BL34893   | III       |                   |                     |                     |  |

Supplemental Table 1. The list of RNAi lines used in this study.

**Supplemental Table 2.** The list of gRNA lines used in this study.

Ochi et al., Table S2

|           | Gene name    | CG #    | gRNA line | stock No. | 25°C              | 25°C                |
|-----------|--------------|---------|-----------|-----------|-------------------|---------------------|
|           |              |         |           |           | Act5C-CoinFLPCas9 | longGMR-CoinFLPCas9 |
| SNARE Qa  | Syx1A        | CG31136 | BL81800   | GS04848   | no phenotype      | no phenotype        |
|           | Syx4         | CG2715  | BL81462   | GS04710   | no phenotype      | no phenotype        |
|           | Syx7         | CG5081  | BL84033   | GS04402   | no phenotype      | no phenotype        |
|           | Syx13        | CG11278 | BL84021   | GS04362   | no phenotype      | no phenotype        |
|           | Syx17        | CG7452  | BL83543   | GS04320   | no phenotype      | no phenotype        |
| SNARE Qb  | Gos28        | CG7700  | BL84027   | GS04369   | no phenotype      | no phenotype        |
|           | Vti1a        | CG3279  | BL83537   | GS04311   | no phenotype      | no phenotype        |
|           | Vti1b        | CG44009 | BL77221   | GS01034   | no phenotype      | no phenotype        |
| SNARE Qc  | Syx6         | CG7736  | BL84244   | GS04342   | no phenotype      | no phenotype        |
|           | Syx8         | CG4109  | BL83560   | GS04349   | no phenotype      | no phenotype        |
|           | Bet1         | CG14084 | BL83536   | GS04309   | III               | no phenotype        |
| SNARE Qbc | Snap24       | CG9474  | BL84035   | GS04409   | no phenotype      | no phenotype        |
|           | Snap25       | CG40452 | BL80880   | GS04784   | no phenotype      | no phenotype        |
|           | Snap29       | CG11173 | BL83927   | GS03522   | no phenotype      | no phenotype        |
| SNARE R   | Sec22        | CG7359  | BL83805   | GS04339   | III               | no phenotype        |
| SNARE Qbc | Snap24       | CG9474  |           |           | no phenotype      | no phenotype        |
|           | Snap25       | CG40452 |           |           | no phenotype      | no phenotype        |
|           | Snap29       | CG11173 |           |           | no phenotype      | no phenotype        |
|           | Snap24/25    |         |           |           | II                | II                  |
|           | Snap24/25/29 |         |           |           | II (small)        | II                  |

### Ochi et al., Supplemental Table 3

| Sequence Files of Plasmids                                                                                                                                                                                                                                    | Name                                   | Source          |
|---------------------------------------------------------------------------------------------------------------------------------------------------------------------------------------------------------------------------------------------------------------|----------------------------------------|-----------------|
| pAc-sgRNA-Cas9(49330).gb                                                                                                                                                                                                                                      | pAc-sgRNA-Cas9                         | Addgene #49330  |
| pAct_FRT_stop_FRT3_FRT3_Gal4_attB(52889).gb                                                                                                                                                                                                                   | pAct-FRT-stop-FRT3-FRT3-FRT3-Gal4-attB | Addgene #52889  |
| pBID-wsh-coinFLP-Gal4.gb                                                                                                                                                                                                                                      | pBID-wsh-coinFLP-Gal4                  | This work       |
| pBID-wsh-coinFLP-HFCas9-H2B-EGFP.gb                                                                                                                                                                                                                           | pBID-wsh-coinFLP-HFCas9-H2B-EGFP       | This work       |
| pBID-wsh-coinFLP-HFCas9-H2B-2xNG.gb                                                                                                                                                                                                                           | pBID-wsh-coinFLP-HFCas9-H2B-2xNG       | This work       |
| pBIDwsh-UASC.gb                                                                                                                                                                                                                                               | pBIDwsh-UASC                           | This work       |
| pCFD4w.gb                                                                                                                                                                                                                                                     | pCFD4w                                 | This work       |
| pCFD5.gb                                                                                                                                                                                                                                                      | pCFD5                                  | This work       |
| pCFD5w(112645).gb                                                                                                                                                                                                                                             | pCFD5w                                 | Addgene #112645 |
| pMT-HA-NBgA-m.gb                                                                                                                                                                                                                                              | pMT-HA-NBgA-m                          | This work       |
| pP-3xlongGMR-coinFLP-HFCas9.gb                                                                                                                                                                                                                                | pP-3xlongGMR-coinFLP-HFCas9            | This work       |
| pP-3xlongGMR-coinFLP-HFCas9-H2B-2xNG.gb                                                                                                                                                                                                                       | pP-3xlongGMR-coinFLP-HFCas9-H2B-2xNG   | This work       |
| pP-longGMR-coinFLP-Gal4.gb                                                                                                                                                                                                                                    | pP-longGMR-coinFLP-Gal4                | This work       |
| pP-longGMR-coinFLP-HFCas9.gb                                                                                                                                                                                                                                  | pP-longGMR-coinFLP-HFCas9              | This work       |
| pP-longGMR.gb                                                                                                                                                                                                                                                 | pP-longGMR                             | This work       |
| pPdm-HA-Snap24.gb                                                                                                                                                                                                                                             | pPdm-HA-Snap24                         | This work       |
| pPdM-HA-Snap25.gb                                                                                                                                                                                                                                             | pPdM-HA-Snap25                         | This work       |
| pPdM-UAST-vAX2m.gb                                                                                                                                                                                                                                            | pPdM-UAST-vAX2m                        | This work       |
| pU62-wsh1.gb                                                                                                                                                                                                                                                  | pU62-wsh1                              | This work       |
| pUAST-Myc-Ykt6.gb                                                                                                                                                                                                                                             | pUAST-Myc-Ykt6                         | This work       |
| pX-HFCas9.gb                                                                                                                                                                                                                                                  | pX-HFCas9                              | This work       |
| pX459 pSpCas9(BB)-2A-Puro V2_0 (62988).gb                                                                                                                                                                                                                     | pX459 pSpCas9(BB)-2A-Puro              | Addgene #62988  |
| Other sequence files                                                                                                                                                                                                                                          |                                        |                 |
| <b>Syx13_genomic(11bp-del).gb</b>                                                                                                                                                                                                                             |                                        |                 |
| Genomic region of <i>Drosophila</i> Syx13, including the genome-edited site. DNA fragments were amplified using primers Syx13-GF1 and Syx13-GR1, then sequenced. The null allele generated in this work, Syx13Δ11(delta-11) has 11 bp deletion shown in red.  |                                        |                 |
| <b>Syx6-M2-1(5bp-del).gb</b>                                                                                                                                                                                                                                  |                                        |                 |
| Genomic region of <i>Drosophila</i> Syx6, including the genome-edited site. DNA fragments were amplified using primers Syx6-GF3 and Syx6-GR3, then sequenced. The null allele generated in this work, Syx6Δ5(delta-5) has 5 bp deletion shown in red.         |                                        |                 |
| <b>longGMR_PCR.gb</b>                                                                                                                                                                                                                                         |                                        |                 |
| Sequence of the longGMR promoter (Wernet et al., 2003). The region containing longGMR promoter was amplified using PCR with primers wdelR_Nhe and Gal4DBD-R2 from a transgenic fly caring P{longGMR-Gal4} (Bloomington <i>Drosophila</i> Stock Center #8605). |                                        |                 |

**Supplemental Table 3.** The list of the sequence files dropped to Dryad.

## Ochi et al., Supplemental Table 4

| Primer name    | Sequence                                               |
|----------------|--------------------------------------------------------|
| TTC-wsh1-F1    | 5'-TTCGCAGGAGCTTTCGCTCAGCAAAGTTATAT-3'                 |
| wsh1-R1p       | 5'phos-GCTTGAATATAACTTTGCTGAGCGAAAGCTCCTGC-3'          |
| wsh1-F2p       | 5'phos-TCAAGCATATTTGCTGAGCGAAAGCTCCTGTTTTTTGGGCC-3'    |
| wsh1-Ap-GTT    | 5'-AACGGGCCAAAAAACAGGAGCTTTCGCTCAGCAAATAT-3'           |
| Nh-U62         | 5'-ggtggtGCTAGCgttcgacttcagcctgaaatacg-3'              |
| gCas9puro-F    | 5'-TGCACCTACTTCTCATTTCCTACTGTCAC-3'                    |
| Sbf-BID-Act-F  | 5'-gatccgcttgcctgcctgaggTCTCGCTGCCTGTTATGTG-3'         |
| Gal4-BID-Xh-R  | 5'-aagatccTCTAGAGGTACCTTACTCTTTTTTTGGGTTTGGTGG-3'      |
| wdeIR_Nhe      | 5'-GGGCTAGCTTCAATGATGTCCAGTGCAG-3'                     |
| Gal4DBD-R2     | 5'-GACTTTTTGGTTTTGGGAGAGTAGCG-3'                       |
| Sph-LongGMR    | 5'-gggcatgctcGAGGacaCCCAGTGAAACC-3'                    |
| UAST-R4        | 5'-TTAAAGGCATTCCACCACTGCTCCC-3'                        |
| HF-Cas9-F      | 5'-TCGCCAACGCAAACCTTCATGCAGCTGATCCACGAC-3'             |
| HF-Cas9-R      | 5'-CATGAAGTTTGCCTGGCGAAGCCGTCGGACTT-3'                 |
| Bg-Coin-Cas9   | 5'-gtgtagtgtgctggtGAATTCaccATGGACTATAAGGACCACGACGGA-3' |
| ddT2A-R        | 5'-TGGGCCAGGATTCTCCTCGAC-3'                            |
| ddT2A-F2       | 5'-GGCAGTGGAGAGGGCAGAGGAAgtctgcta-3'                   |
| H2B-EGFP-BID-K | 5'-cacaagatccTCTAGAGGTACCTTAAACGGGCCCTCTAGACTTGTA-3'   |
| Xh-dYkt6       | 5'-GGctcgagTGTCAAACTATTCGCGTTGAGCATC-3'                |
| dYkt6-Mlu      | 5'-ccACGCGTCTAGGTGAAGCTGCAGCAGGAG-3'                   |
| Xh-Snap24      | 5'-GGCTCGAGTATGGCCGCGTGGAGAATGCC-3'                    |
| Snap24-Ap      | 5'-ggtGGGCCCTTAACTCTTGAGCAGATTGTTGGCG-3'               |
| Xh-Snap25      | 5'-GGCTCGAGTatgccagcgatccatctgaa-3'                    |
| Snap25-Ap      | 5'-ggtGGGCCctactttaatagttgatgctcccttg-3'               |
| Sgf-U61F       | 5'-atagccaagaatggaGCGATCGCgaattcatttcaacgtcctcga-3'    |
| dU6-wsh-fix    | 5'-gaacgctagcAAAAAAGCACCGACTCGGTGCCAC-3'               |
| Syx6-gRNA3f    | 5'-TTCGTACCATAGCTGGGACCATGT-3'                         |
| Syx6-gRNA3r    | 5'-AAACACATGGTCCCAGCTATGGTA-3'                         |
| Syx13-GF1      | 5'-ttgtctgttgcctcgcgagtggt-3'                          |
| Syx13-GR1      | 5'-gtggaactgcgtgcatctgggtc-3'                          |
| Syx6-GF2       | 5'-atgaaaagaaccgtcaagtgcgcc-3'                         |
| Syx6-GR2       | 5'-gagatcccactcgatgctccgtag-3'                         |
| Syx6-GF3       | 5'-cgatgaggtcaagcagATGAAGG-3'                          |
| Syx6-GR3       | 5'-TGTTTCGCCACGTACCTATGACT-3'                          |

**Supplemental Table 4.** The list of the primers we used in this study.
